# Supplementary material for: Embryonic Morphogen Nodal Promotes Breast Cancer Growth and Progression
Source: PubMed Central journal article supplement (PMC3492336; doi:10.1371/journal.pone.0048237), 2012-11-07
Supplement: pone.0048237.s002.pdf [file pone.0048237.s002.pdf]

**Table S1: PrimerProbe information for Real-time PCR.**

| <b>Target</b>  | <b>Probe ID</b> |
|----------------|-----------------|
| Nodal          | Hs00250630_s1   |
| ALK-4 (ACVR1B) | Hs00244715_m1   |
| ALK-7 (ACVR1C) | Hs00377065_m1   |
| Cripto-1       | Hs02339499_g1   |
| BAX            | Hs00751844_s1   |
| BCL2           | Hs00751844_s1   |
| RPLPO          | 4333761-0707014 |
| HPRT1          | 4333768-0904021 |
